# Supplementary material
Source: Springer Nature journal article supplement (https://www.springermedizin.de/resource/supplementary/12876_2013_1174_MOESM3_ESM.pdf/9438260)

(A)

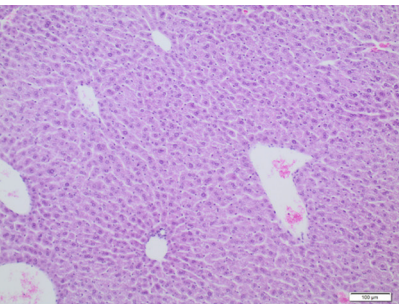

(B)

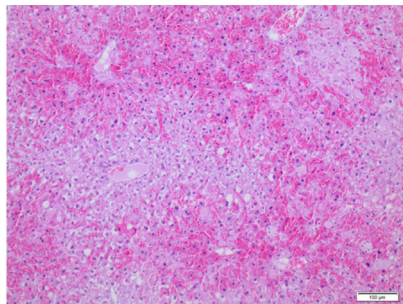

(C)

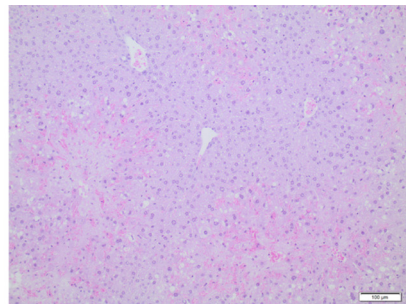

(D)

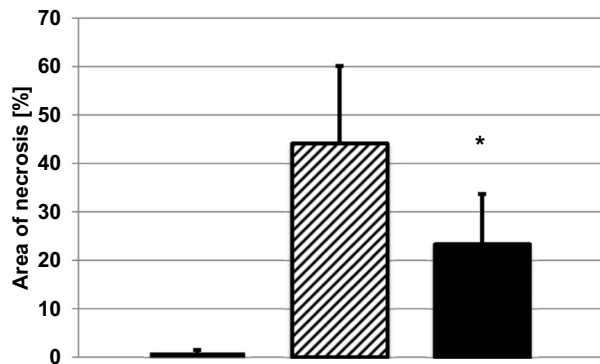

(E)

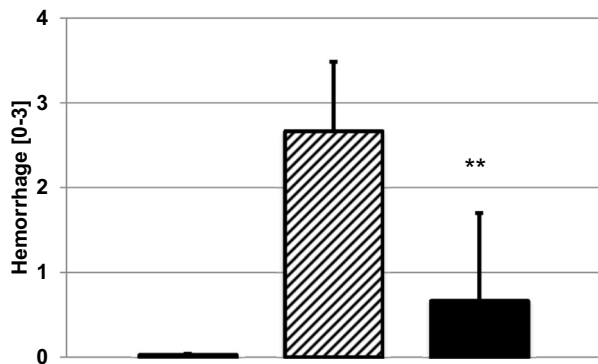

Supplement: MOESM3 [file 9438260]
